# Supplementary material
Source: PubMed Central journal article supplement (PMC3383654)
Supplement: NIHMS268250-supplement-Supp_Figure_S1-S3___Table_S1-S4.pdf [file NIHMS268250-supplement-Supp_Figure_S1-S3___Table_S1-S4.pdf]

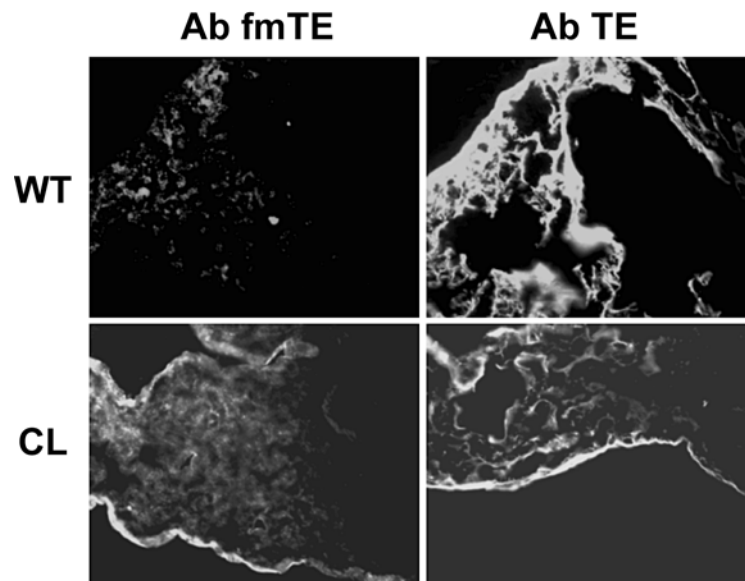

**Supp. Figure S1.** Specific detection of mutant elastin by the fmTE antibody. Frozen lung sections of transgenic mice expressing fmTE from a bacterial artificial chromosome transgene (CL) and control wildtype (WT) mice were stained with antibodies against fmTE and against normal tropoelastin (TE). The fmTE antibody reacted only the mutant transgenic tissue (CL) whereas the TE antibody reacted with both mutant and wild type tissue.

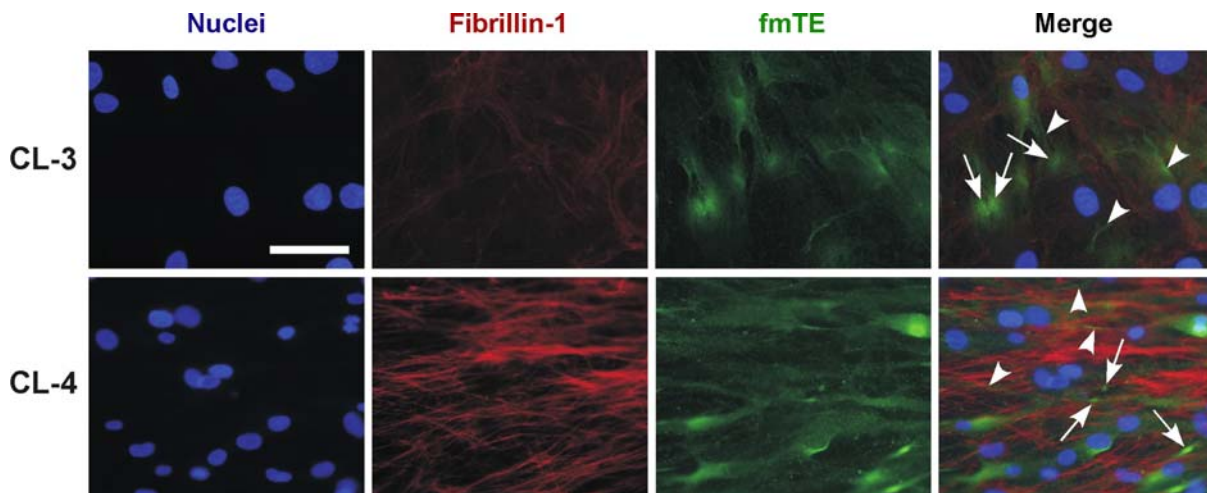

**Supp. Figure S2.** Colocalization immunofluorescent staining for fibrillin-1 (red) and fmTE (green) with a polyclonal antibody against a C-terminal epitope of -1 frameshift mutant elastin in permeabilized fibroblast cultures from both patients CL-3 and CL-4 showed more incorporation of mutant elastin into globules and less deposition into elastic fibers than TE. Arrows: clumps of elastin; arrowhead: elastic fiber. Nuclei were stained blue. Scale bar: 25  $\mu\text{m}$ .

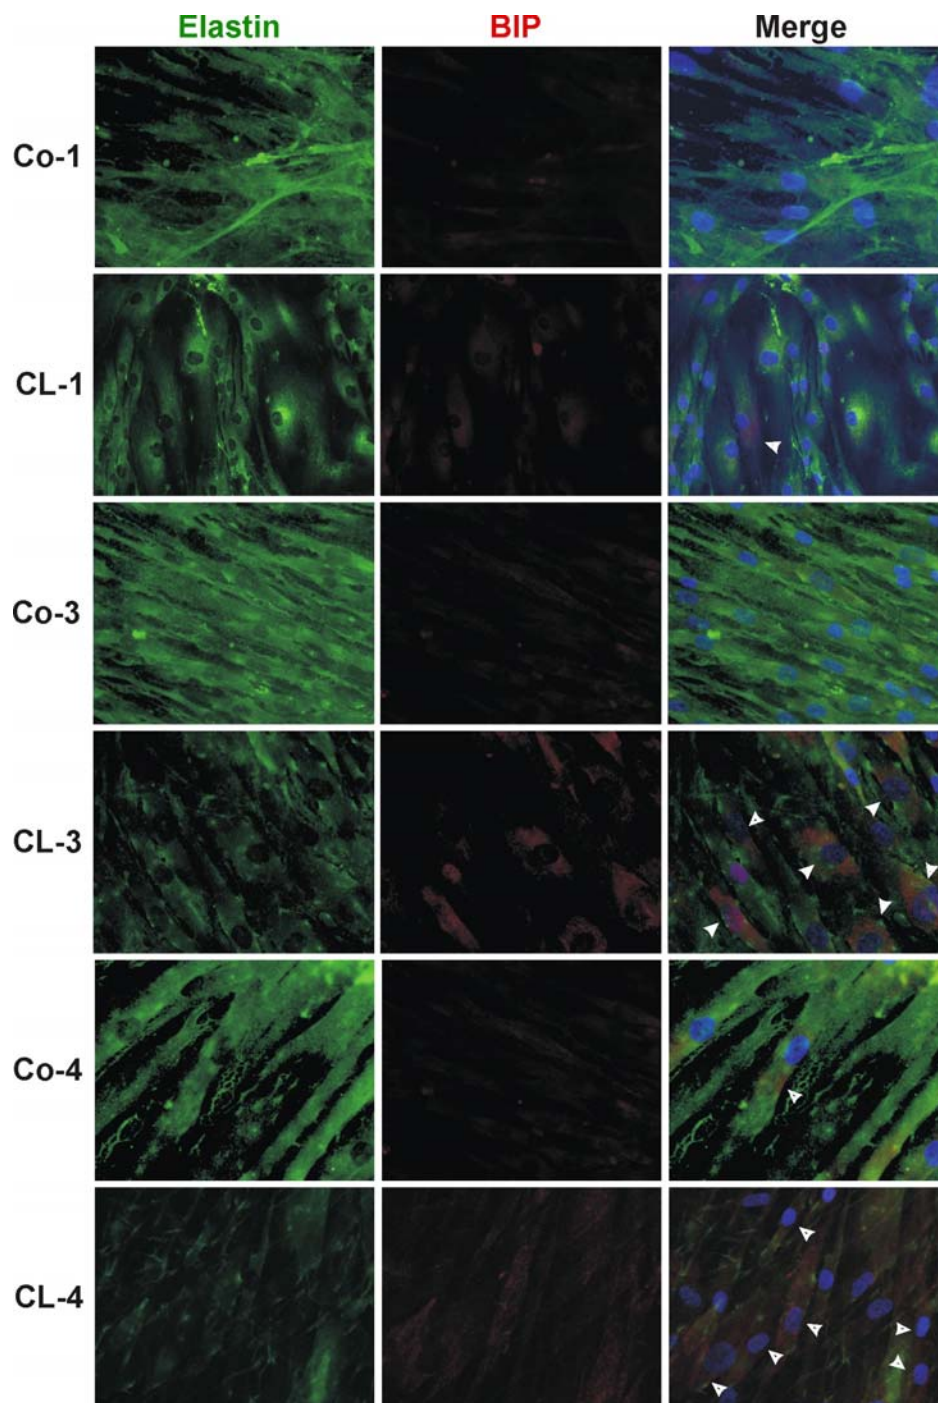

**Supp. Figure S3.** Immunofluorescent staining for elastin (green) and BiP (red) of permeabilized fibroblast cultures of patients (CL-1, CL-3, and CL-4) and matching controls (Co-1, Co-3, Co-4). Arrowheads show double positive cells in merged images. Nuclei were counterstained blue.

**Supp. Table S1. Primers and PCR conditions for gDNA sequencing of Elastin exon 28-34**

| <b>Primers ELN ex. 28-34 (gDNA)</b> |                      | <b>PCR method</b> |
|-------------------------------------|----------------------|-------------------|
| ELN_Ex28_F                          | gacccatcggtcagaaatgg | TD 62 - 50°C      |
| ELN_Ex28_R                          | agggaggcactctgtactgg | TD 62 - 50°C      |
| ELN_Ex29_F                          | cagagtgcctccctgaactc | TD 62 - 50°C      |
| ELN_Ex29_R                          | gtcagaagctcctccacac  | TD 62 - 50°C      |
| ELN_Ex30_F                          | tcagtcccaccttctgacc  | TD 62 - 50°C      |
| ELN_Ex30_R                          | ctcgatacacacaccacac  | TD 62 - 50°C      |
| ELN_Ex31_F                          | attcctgagccgtcatgtg  | TD 62 - 50°C      |
| ELN_Ex31_R                          | cactggcaggaaggcatc   | TD 62 - 50°C      |
| ELN_Ex32_F                          | tcttacctgacccacctg   | TD 62 - 50°C      |
| ELN_Ex32_R                          | ggagtcccactgctagatg  | TD 62 - 50°C      |
| ELN_Ex33_F                          | tgcaggcagaaagtgatgag | TD 62 - 50°C      |
| ELN_Ex33_R                          | gagatggcacaggagaggag | TD 62 - 50°C      |
| ELN_Ex34_F                          | attcgagtgggtcagagcag | TD 62 - 50°C      |
| ELN_Ex34_R                          | cgttgatgaggtcgtgagtc | TD 62 - 50°C      |

TD: touch-down PCR.

Each PCR mix contains 14  $\mu$ l H<sub>2</sub>O, 2  $\mu$ l of 10  $\mu$ M forward primer, 2  $\mu$ l of 10  $\mu$ M reverse primer, 2  $\mu$ l of 10x supermix (Invitrogen), and 0.05  $\mu$ l of platinum Taq polymerase (Invitrogen).

**Supp. Table S2. Antibodies used in this study**

| <b>Antigen</b> | <b>Host (type)</b>     | <b>Label</b>              | <b>Conc.</b> | <b>Provider</b>                              | <b>Cat. #</b> |
|----------------|------------------------|---------------------------|--------------|----------------------------------------------|---------------|
| TE/elastin     | Rabbit<br>(polyclonal) | -                         | 1:200        | Dr. Mecham*                                  |               |
| fmTE           | Rabbit<br>(polyclonal) | -                         | 1:200        | Dr. Mecham                                   |               |
| Fibrillin-1    | Mouse<br>(monoclonal)  | -                         | 1:500        | Chemicon,<br>Billerica, MA                   | MAB1919       |
| BiP            | Mouse<br>(monoclonal)  | -                         | 1:1000       | BD<br>Bioscience,<br>Franklin<br>Lakes, NJ   | 610978        |
| pElF2 $\alpha$ | Rabbit<br>(polyclonal) | -                         | 1:500        | Cell Signaling<br>Technology,<br>Danvers, MA | 3597          |
| Caspase-3      | Rabbit<br>(monoclonal) | -                         | 1:200        | Cell Signaling<br>Technology                 | 9664          |
| pSMAD2         | Rabbit<br>(polyclonal) | -                         | 1:500        | Cell Signaling<br>Technology                 | 3101S         |
| rabbit IgG     | Donkey<br>(monoclonal) | AlexaFluor<br>488 (red)   | 1:500        | Invitrogen,<br>Carlsbad, CA                  | A21203        |
| Mouse IgG      | Donkey<br>(monoclonal) | AlexaFluor<br>594 (green) | 1:500        | Invitrogen,<br>Carlsbad, CA                  | A21206        |

Conc.: concentration

\*: Washington University School of Medicine, St-Louis, MO

Cat. #: catalog number

**Supp. Table S3. Relative abundance of *ELN* transcript species**

| Patient                | Without CHX          |                      |                      |                      |            | With CHX             |                      |                      |                      |            |
|------------------------|----------------------|----------------------|----------------------|----------------------|------------|----------------------|----------------------|----------------------|----------------------|------------|
|                        | Exon 32 skip         |                      | Full length          |                      | Total (%)  | Exon 32 skip         |                      | Full length          |                      | Total (%)  |
|                        | WT (%)               | MT (%)               | WT (%)               | MT (%)               |            | WT (%)               | MT (%)               | WT (%)               | MT (%)               |            |
| <b>Control</b><br>(SD) | <b>69.3</b><br>(8.2) | -                    | <b>30.7</b><br>(8.2) | -                    | <b>100</b> | <b>62.9</b><br>(6.7) | -                    | <b>37.1</b><br>(6.7) | -                    | <b>100</b> |
| <b>CL-3</b><br>(SD)    | <b>22.4</b><br>(2.1) | <b>63.3</b><br>(4.0) | <b>7.2</b><br>(1.1)  | <b>7.1</b><br>(1.4)  | <b>100</b> | <b>27</b><br>(3.0)   | <b>51</b><br>(5.7)   | <b>11.2</b><br>(1.6) | <b>10.9</b><br>(1.3) | <b>100</b> |
| <b>CL-4</b><br>(SD)    | <b>36.1</b><br>(3.1) | -                    | <b>9.6</b><br>(0.8)  | <b>54.3</b><br>(3.7) | <b>100</b> | <b>40.5</b><br>(1.1) | -                    | <b>11.3</b><br>(0.5) | <b>48.2</b><br>(0.8) | <b>100</b> |
| <b>CL-1</b><br>(SD)    | <b>17.6</b><br>(0.8) | <b>49.8</b><br>(2.6) | <b>6.8</b><br>(0.3)  | <b>25.8</b><br>(1.6) | <b>100</b> | <b>23.6</b><br>(1.7) | <b>43.7</b><br>(2.9) | <b>9.2</b><br>(0.7)  | <b>23.5</b><br>(0.7) | <b>100</b> |

CHX: cycloheximide

WT: wild type allele

MT: mutant allele

SD: standard deviation of the mean

**Supp. Table S4. Aortic involvement in all published ADCL patients to date with an N-terminal *ELN* mutation**

|                                 | <b>ARD</b> | <b>No ARD</b> | <b>All patients</b> |
|---------------------------------|------------|---------------|---------------------|
| <b>Ex. 32 mutations</b>         | 0          | 4             | 4                   |
| <b>Mutations outside ex. 32</b> | 9          | 1             | 10                  |
| <b>All mutations</b>            | 9          | 5             | 14                  |

ARD: Aortic root dilatation.

Fisher's exact test:  $p = 0.005$

3 patients with unknown clinical data and 3 patients with a chromosomal rearrangement were excluded from the analysis.
